# Supplementary material for: Uncovering the Drivers and Regional Variability of Cotton Yield in China
Source: MDPI journal article supplement (doi:10.3390/agriculture13112132), 2023-11-11
Supplement: s1 [file s1]

Archive with 1 entries (1 files):
- agriculture-2685921-supplementary.pdf
