# Supplementary material for: Uncovering the Drivers and Regional Variability of Cotton Yield in China
Source: MDPI journal article supplement (doi:10.3390/agriculture13112132), 2023-11-11
Supplement: s1 [file s1 › agriculture-2685921-supplementary.pdf]

## Supplementary information

**Supplemental Table S1.** Statistical results of cotton phenological event date in three main regions.

| Region | Statistics | Sowing   | Emergence | Squaring | Flowing     | Boll opening | Maturity     |
|--------|------------|----------|-----------|----------|-------------|--------------|--------------|
| NC     | Maximum    | May 19   | May 20    | June 29  | August 20   | October 20   | November 25  |
|        | Minimum    | March 24 | April 6   | May 18   | June 6      | July 18      | September 12 |
|        | Mean       | April 15 | April 27  | June 7   | July 2      | September 2  | October 17   |
|        | Median     | April 15 | April 27  | June 6   | July 1      | August 30    | October 17   |
|        | Mode       | April 8  | April 30  | May 30   | June 30     | August 30    | October 18   |
| YERB   | Maximum    | June 9   | June 16   | July 24  | September 4 | October 12   | November 24  |
|        | Minimum    | March 27 | April 6   | May 30   | June 17     | August 9     | August 23    |
|        | Mean       | April 26 | May 5     | June 19  | July 10     | September 4  | October 20   |
|        | Median     | April 25 | May 4     | June 18  | July 9      | September 5  | October 20   |
|        | Mode       | April 16 | April 30  | June 10  | July 8      | August 31    | October 18   |
| YERB   | Maximum    | May 26   | May 29    | July 31  | August 11   | October 30   | December 17  |
|        | Minimum    | March 14 | March 20  | May 26   | June 16     | July 26      | September 13 |
|        | Mean       | April 12 | April 23  | June 21  | July 12     | August 31    | October 29   |
|        | Median     | April 13 | April 22  | June 20  | July 12     | August 30    | October 28   |
|        | Mode       | April 17 | April 22  | June 18  | July 10     | August 30    | October 28   |

**Note:** NC is Northwest China. YERB is the Yellow River Basin, YARB is the Yangtze River Basin.

## Supplementary Figure S1.

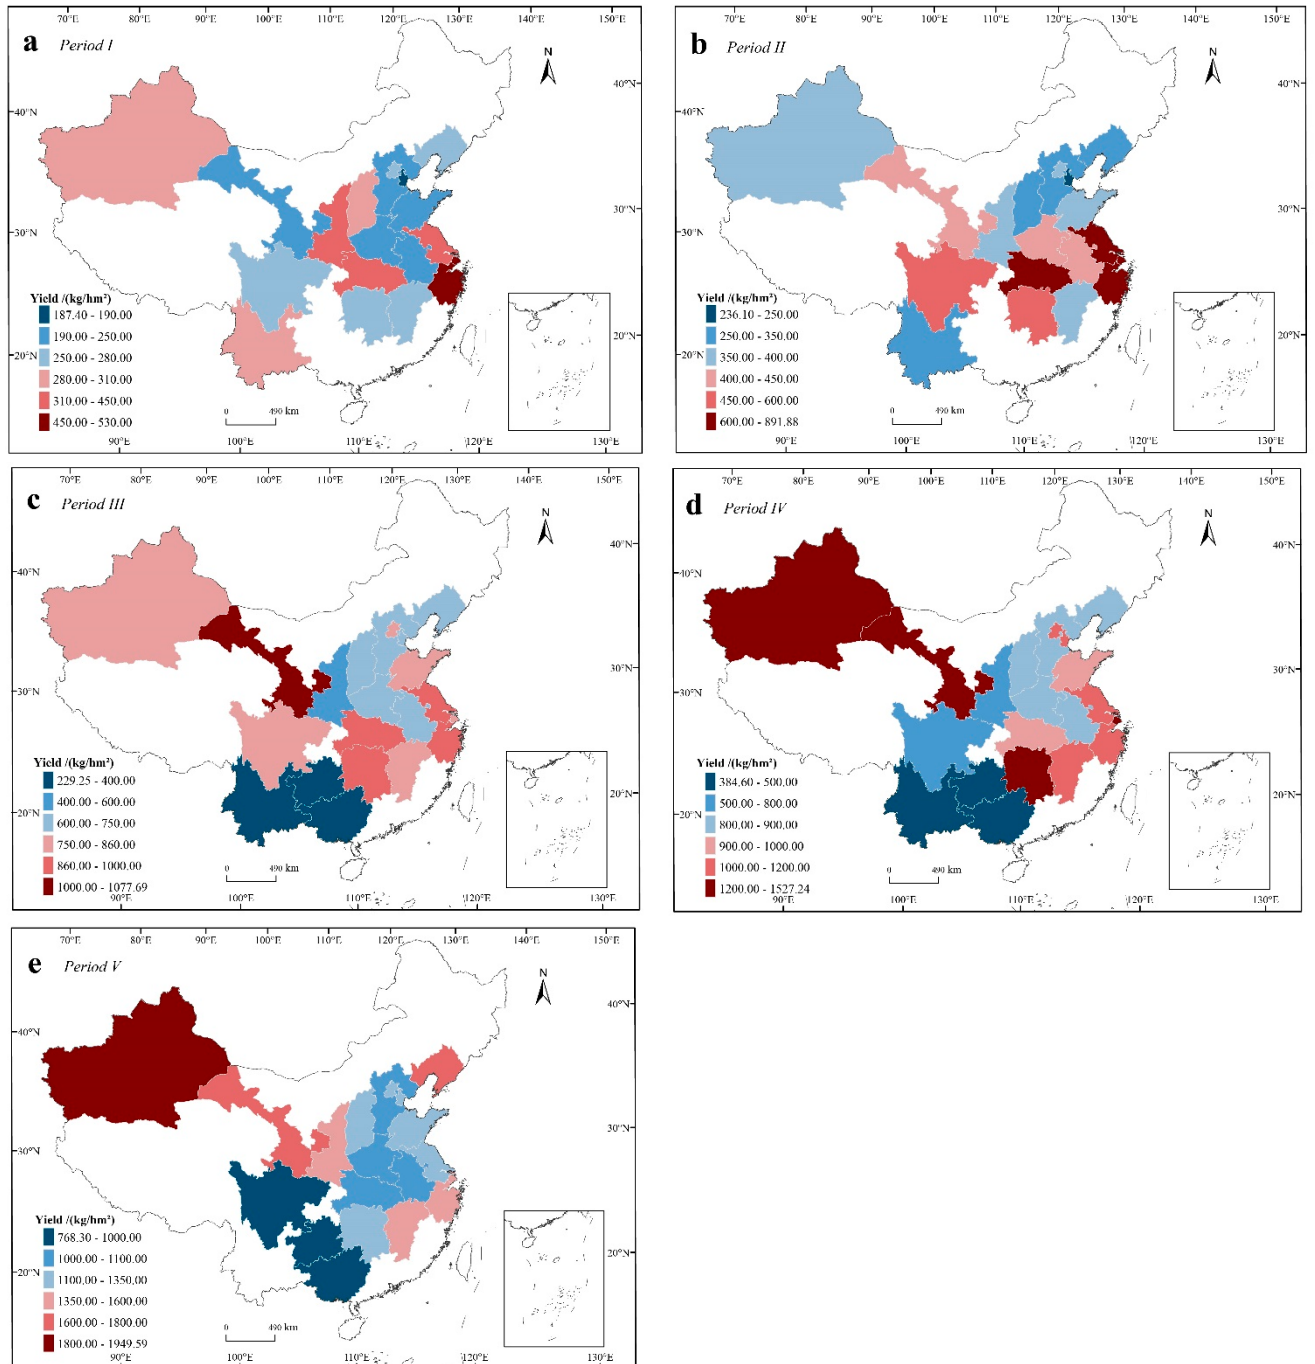

**Supplementary Figure S1.** Maps showing spatial distribution of cotton yield from 1949 to 2020: (a) period I (1949–1967), (b) period II (1968–1981), (c) period III (1982–1992), (d) period IV (1993–2006), (e) period V (2007–2020). The base map was applied without endorsement using data from the National Geomatics Center of China (NGCC; <http://www.ngcc.cn/ngcc/>) and the Institute of Agricultural Resources and Regional Planning, Chinese Academy of Agricultural Sciences (IARRP; <https://iarrp.caas.cn/>).

**Supplementary Figure S2.**

**(a)**

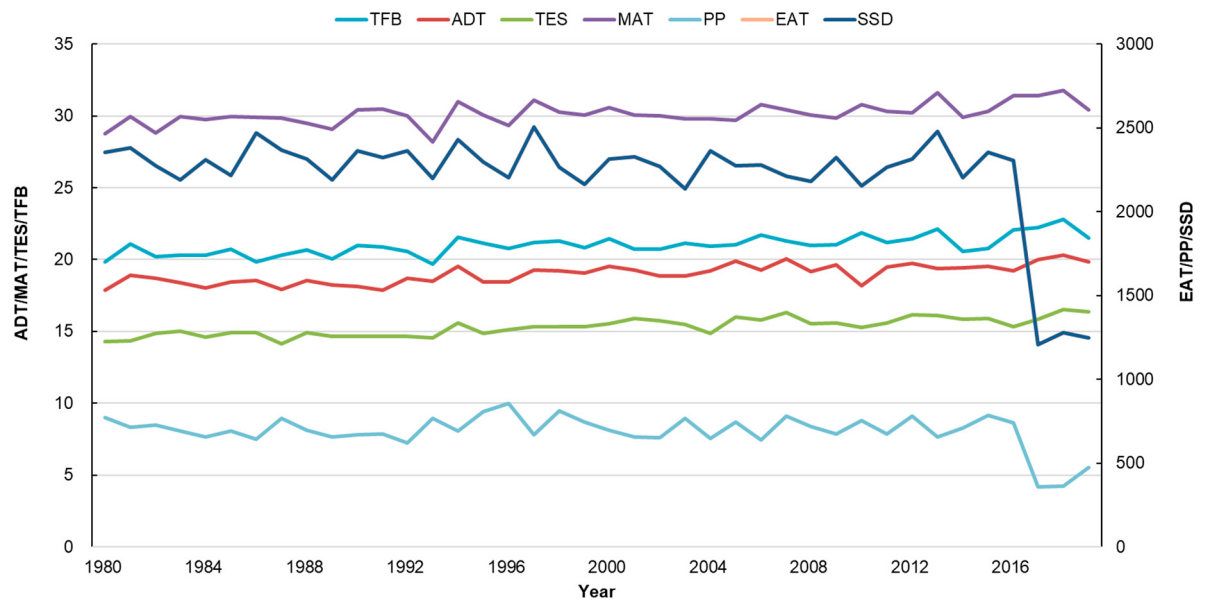

**(b)**

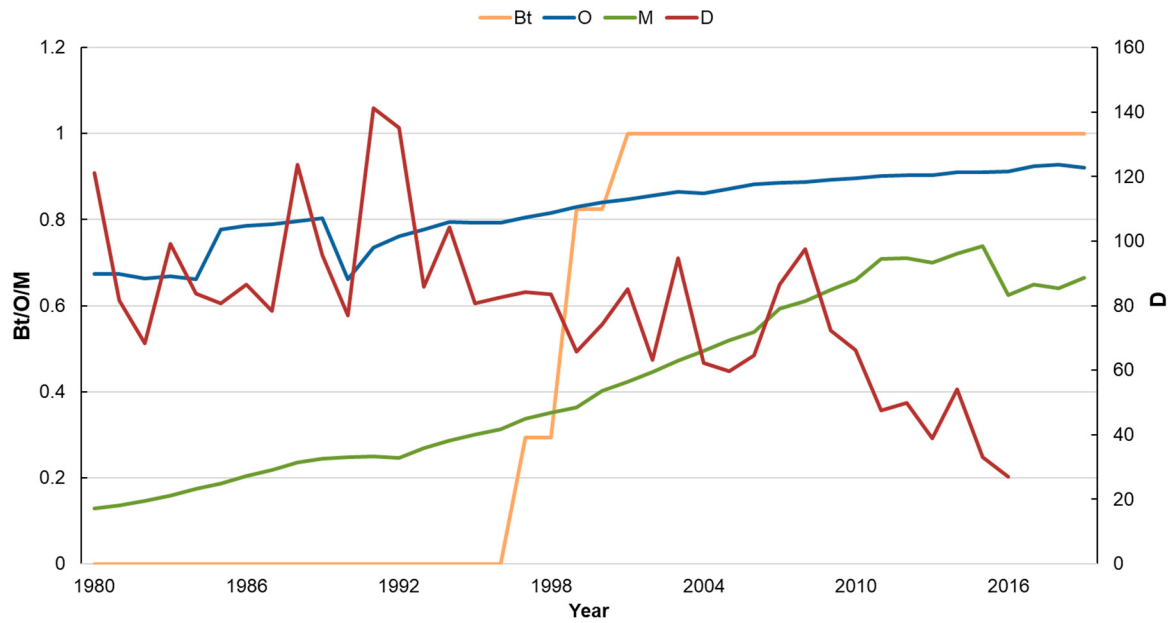

**Supplementary Figure S2.** Trends in various influencing factors in China from 1980 to 2020: (a) Climate factors; (b) Social, technological and disaster factors.
